# Supplementary material for: Increased PD-L1 expression and IL-6 secretion characterize human lung tumor-derived perivascular-like cells that promote vascular leakage in a perfusable microvasculature model
Source: PubMed Central journal article supplement (PMC5587684; doi:10.1038/s41598-017-09928-1), 2017-09-06
Supplement: 41598_2017_9928_MOESM4_ESM.pdf [file 41598_2017_9928_MOESM4_ESM.pdf]

Supplementary Information for the manuscript

**Increased PD-L1 expression and IL-6 secretion characterize human lung tumor-derived perivascular-like cells that promote vascular leakage in a perfusable microvasculature model**

Colette A. Bichsel, Limei Wang, Laurène Froment, Sabina Berezowska, Stefan Müller, Patrick Dorn, Thomas M. Marti, Ren-Wang Peng, Thomas Geiser, Ralph A. Schmid, Olivier T. Guenat and Sean R.R. Hall

**Supplementary Figures**

Figure S1

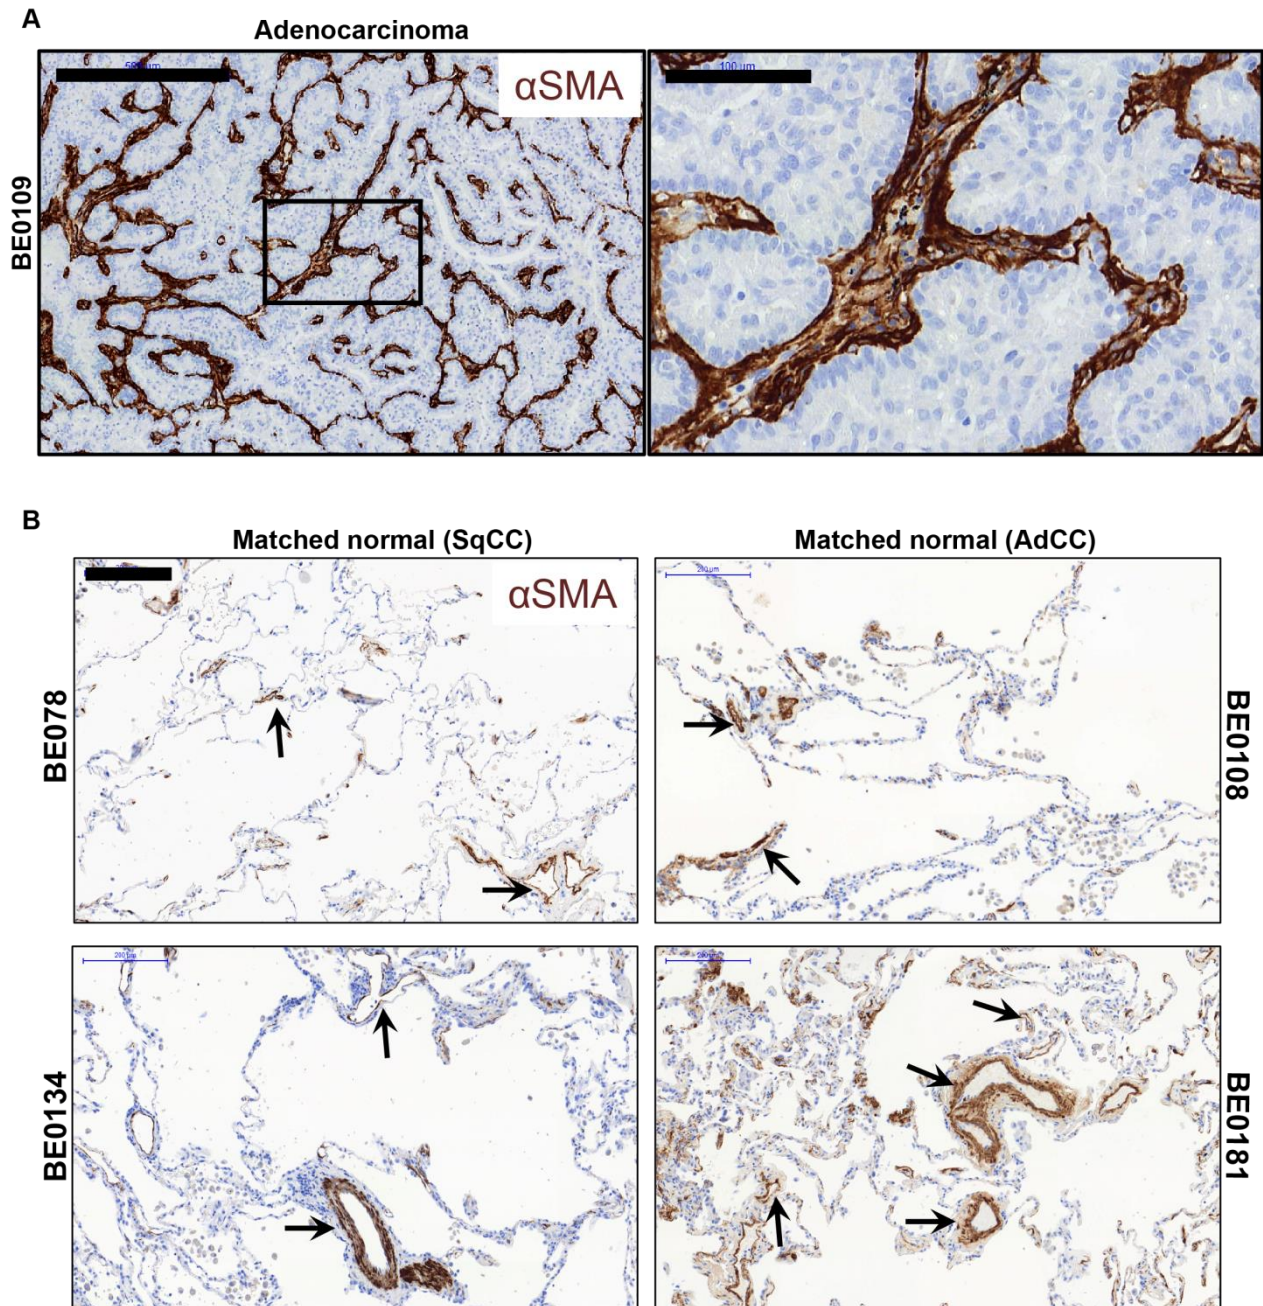

**Figure S1. Presence of activated  $\alpha$ SMA+ stroma in NSCLC.** (A) Representative immunohistochemistry section from a lung adenocarcinoma patient specimen show  $\alpha$ SMA+ stroma throughout the tumor foci. Scale bar 500  $\mu$ m. Higher magnification in highlighted region (black rectangle). Scale bar 100  $\mu$ m. (B) Representative sections taken from nonadjacent normal section of the lung from matched specimens. In the

distal area of the uninvolved normal lung, areas of aSMA can be seen primarily surrounding both small and large vessels (black arrows). Scale bar 200  $\mu$ m. Related to Figure 1.

**Figure S2**

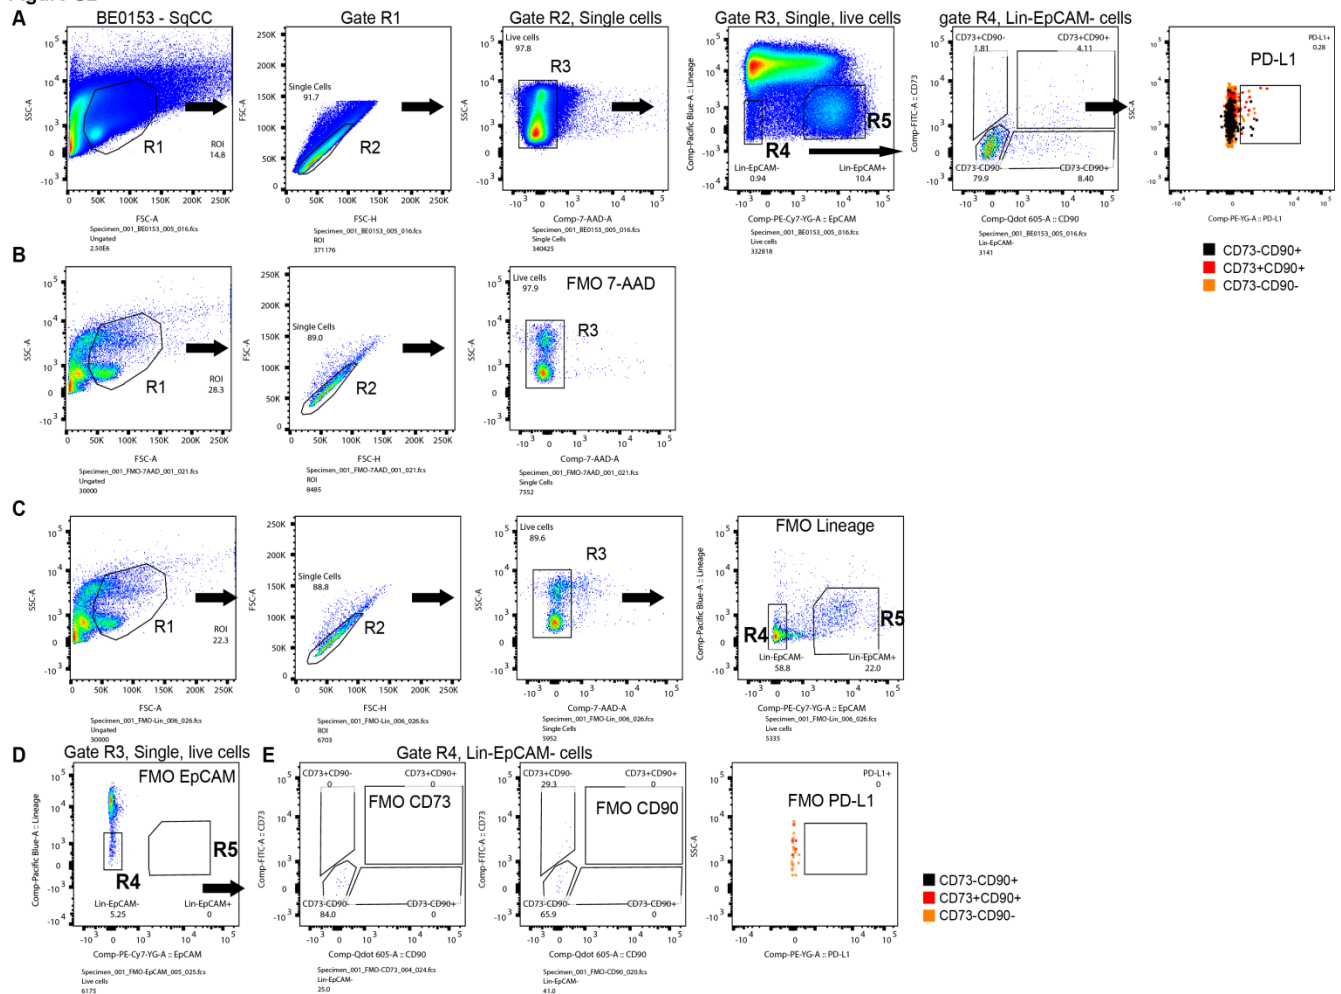

**Figure S2. Fluorescence minus one controls to identify mesenchymal cell subsets in NSCLC.** Representative experiment showing the sequential gating strategy and fluorescence minus one (FMO) controls to properly set cell population boundaries. (A) Sequential gating strategy demonstrating detection of mesenchymal cell subsets that express PD-L1 in a representative NSCLC specimen (BE0153-SqCC). (B) R1 gate initially displayed on a SSC/FSC color density plot subgated to select single cells based

on FSC-A versus FSC-H (R2 gate), which was further subgated for identification of live (FMO 7-AAD) cells (R3 gate). (C) R3 gate identifying single, live cells subgated to show the boundary of Lin+ population (FMO Lineage) from the mesenchymal (gate R4, Lin-EpCAM-) and epithelial (gate R5, Lin-EpCAM+) populations. (D) Single, live cells (Gate R3) were displayed on a bivariate plot to determine the boundary of the Lin-EpCAM- (gate R4) population using FMO EpCAM. (E) Lin-EpCAM- cells (Gate R4) displayed as a bivariate plot to identify the boundary for CD73+ cells (left, FMO CD73), CD90+ cells (centre, FMO CD90) and PD-L1 (FMO PD-L1). Related to Figure 2.

Figure S3

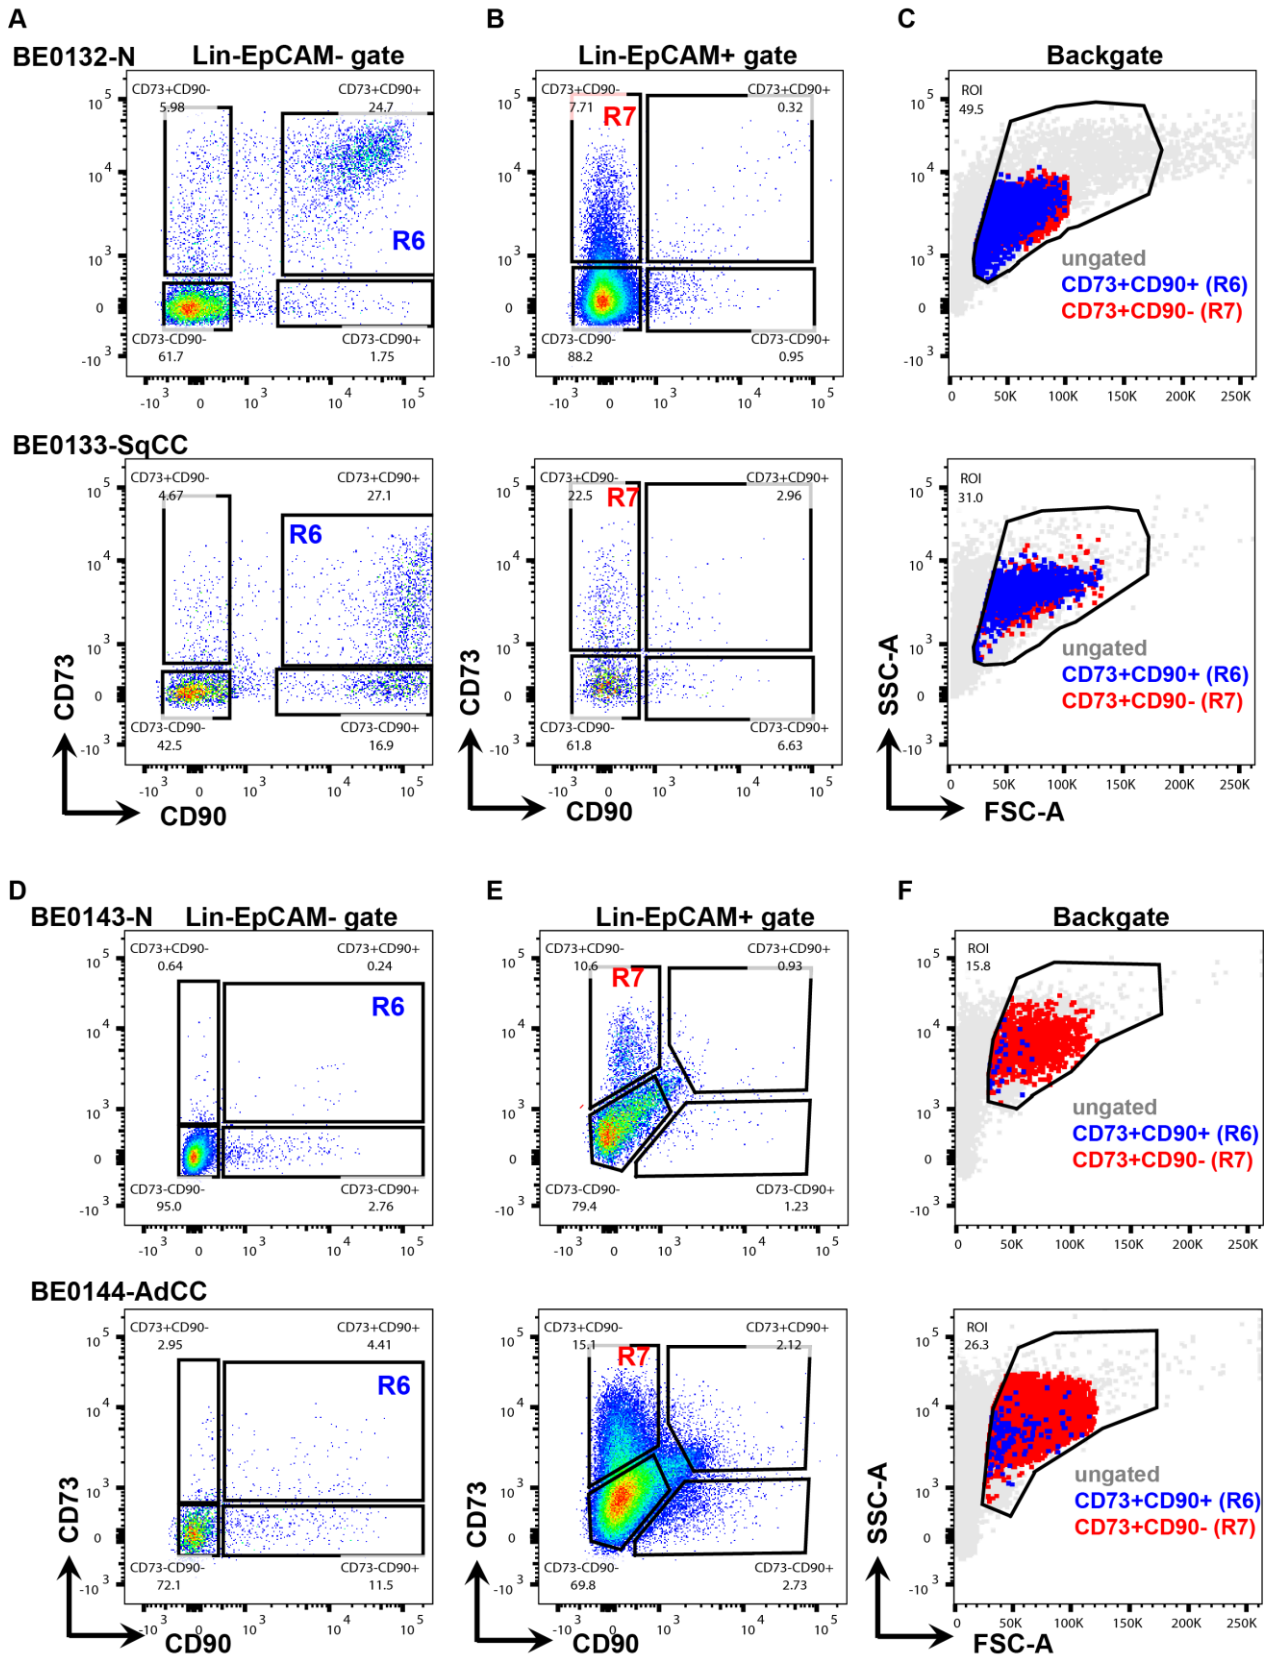

**Figure S3. Back-gating strategy shows location of mesenchymal cell subsets in NSCLC.** Backgating strategy to visualize final gated cells on previous plots in representative NSCLC samples and matched nonadjacent normal tissue. Bivariate plots identifying clusters of mesenchymal (A) and epithelial cells (B) in normal (BE0132-N, upper plots) and NSCLC specimen (BE0133-SqCC, lower plots). R6 and R7 gates displayed on a SSC/FSC color density plot to display their location using backgating. (D-F) Representative plots showing backgating strategy showing location of cells in gates R6 and R7 for a Adenocarcinoma specimen (BE0144-Ad). Related to Figure 2.

Figure S4

A

Lin-EpCAM- gate R4

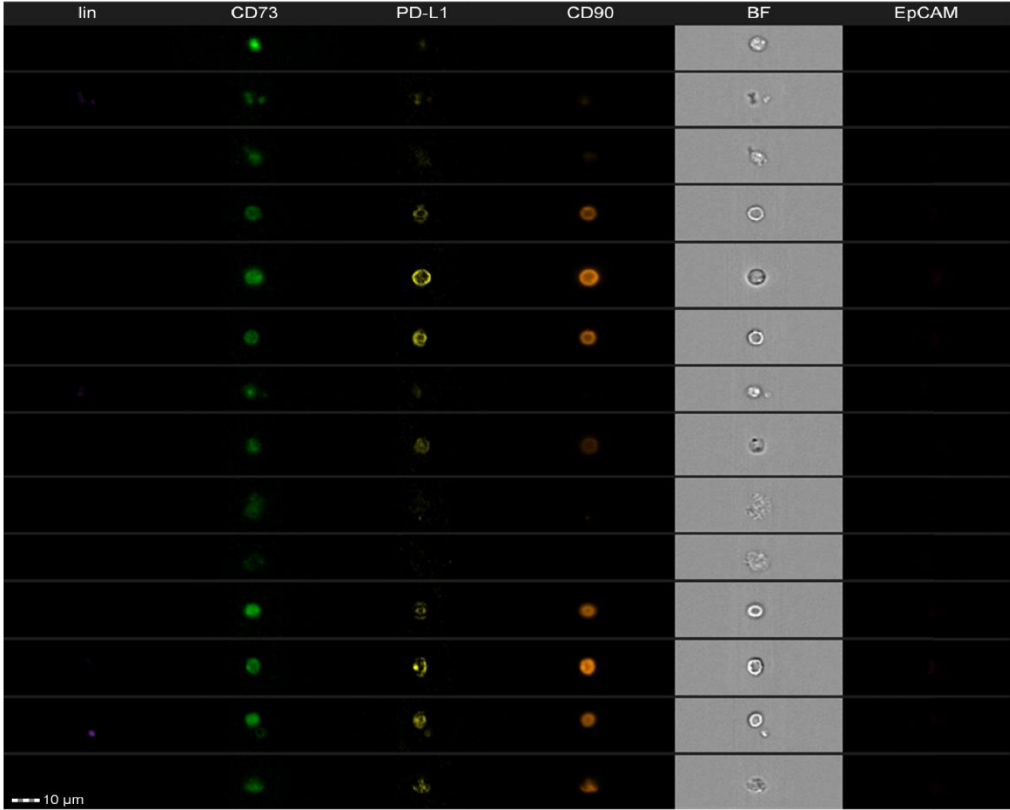

B

Lin-EpCAM+ gate R5

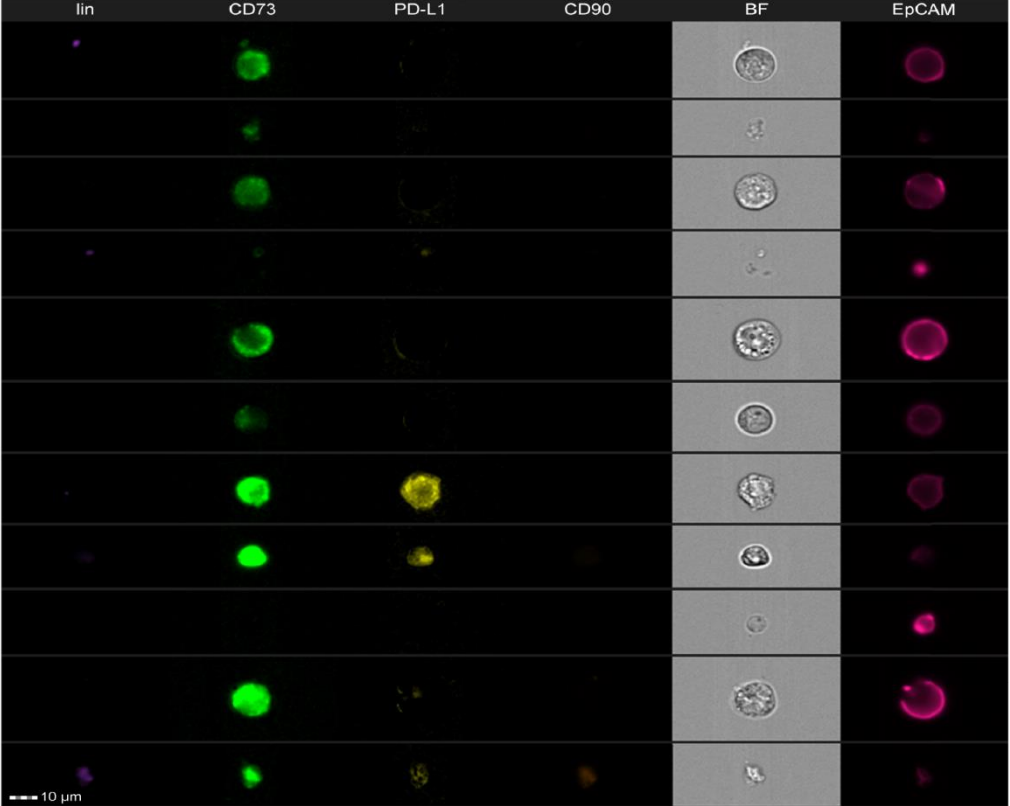

Figure S4. Tumor-derived perivascular-like cells. (A-B) Representative images of single cells obtained from a lung adenocarcinoma patient using the ImageStream® system (Amnis, Millipore). Each cell is represented by six images in a row acquired simultaneously showing with high sensitivity both morphology via transmitted light (BF, bright field) and membranous fluorescent staining pattern. Related to Figure 2E and I.



Figure S5

A

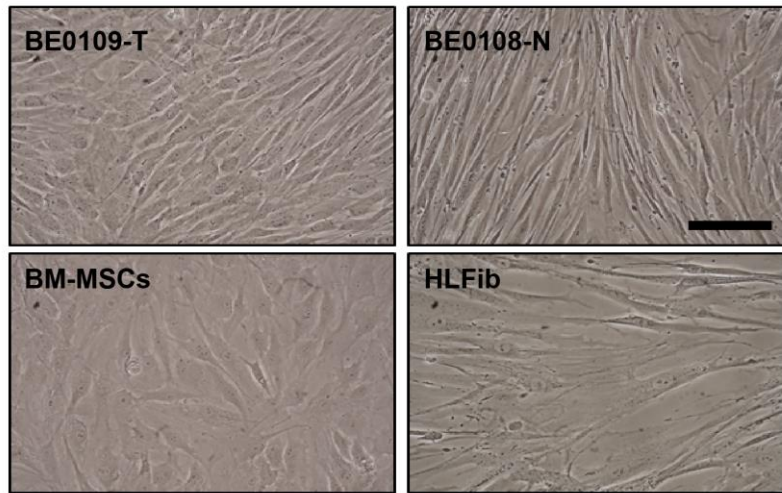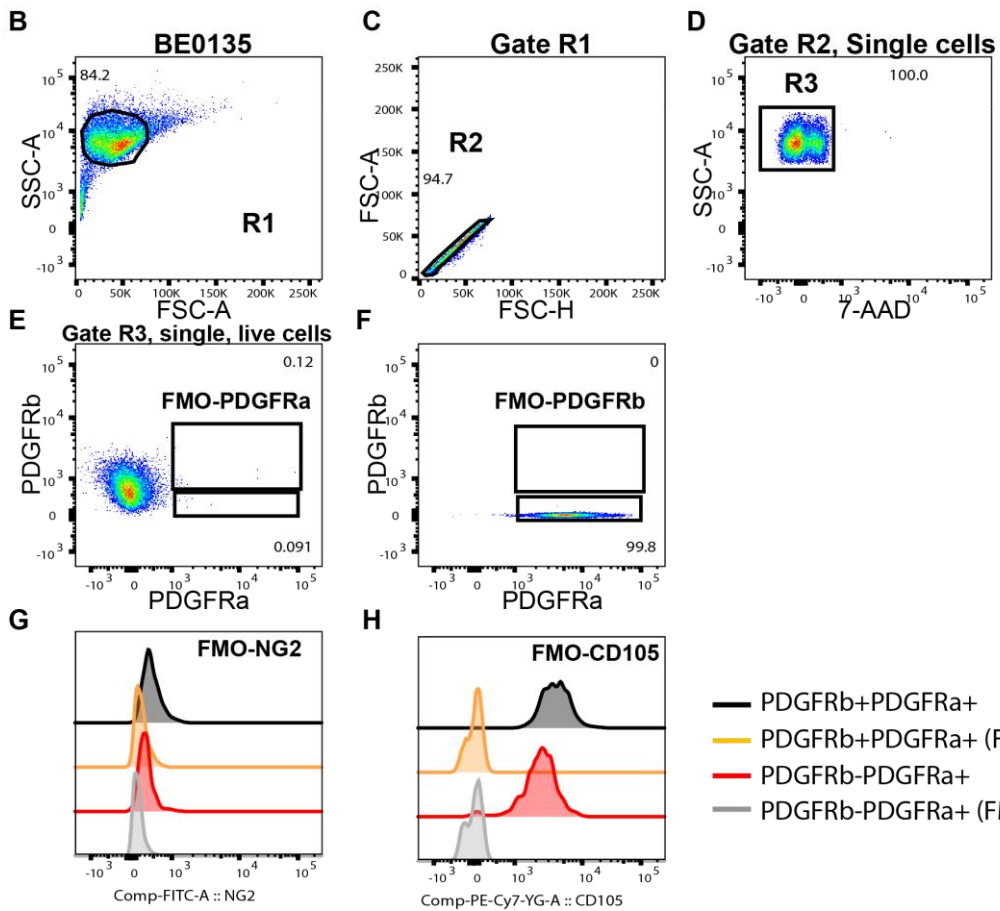

Figure S5. (A) Representative phase contrast images of tumor and normal Lin-EpCAM-CD73+CD90+ cells, as well as human lung fibroblasts and BM-MSCs. Scale bar 50 $\mu$ m. (B-G) FMO strategy to show location of boundaries for various immunophenotypic markers in culture expanded cells. Related to Figure 3.

Figure S6

A

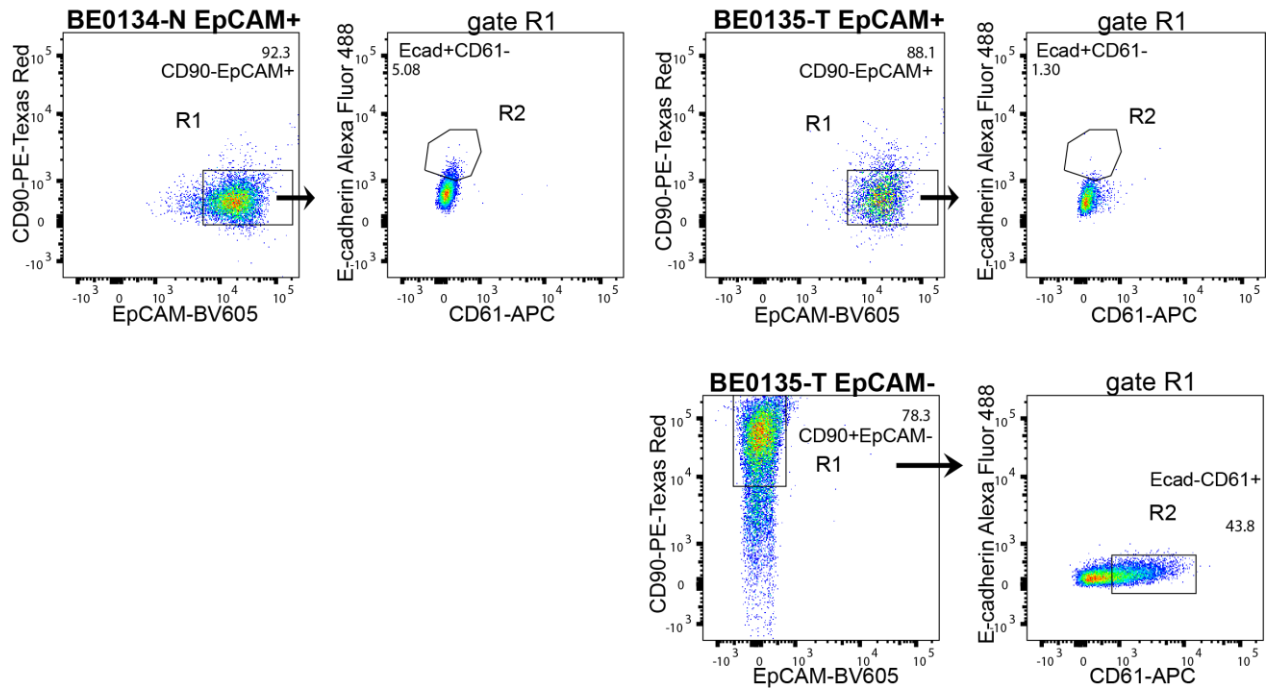

B

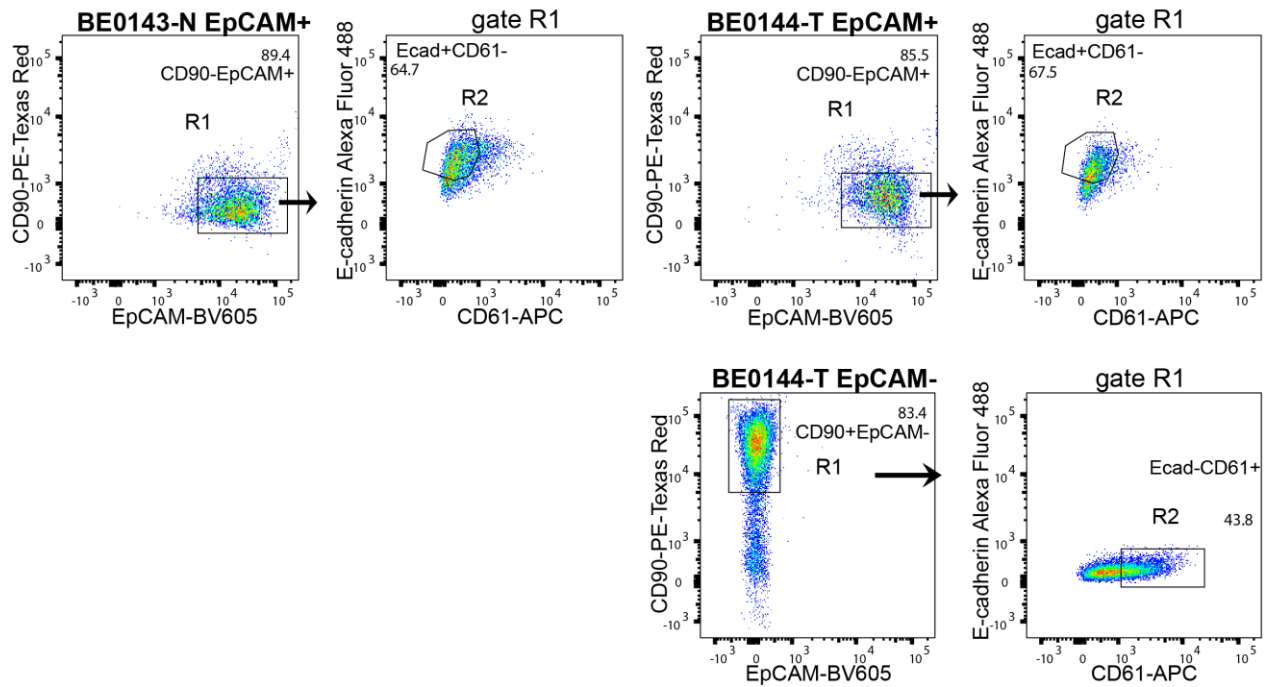

Figure S6. (A) Representative bivariate flow cytometric plots showing the expression of CD90-PE-Texas Red, EpCAM-BV605™, E-Cadherin Alexa Fluor®488 and CD61-APC in prospectively isolated, single, live Lin-EpCAM-CD73+CD90+ and Lin-EpCAM+CD73+CD90- cells following their expansion from tumor and matched normal specimens. BE0134 (normal) and BE0135 (tumor) (A) and BE0143 (normal) and BE0144 (tumor) (B) are shown. FMO strategy was used to determine the location of boundaries for the immunophenotypic markers in culture expanded cells (data not shown).

Figure S7

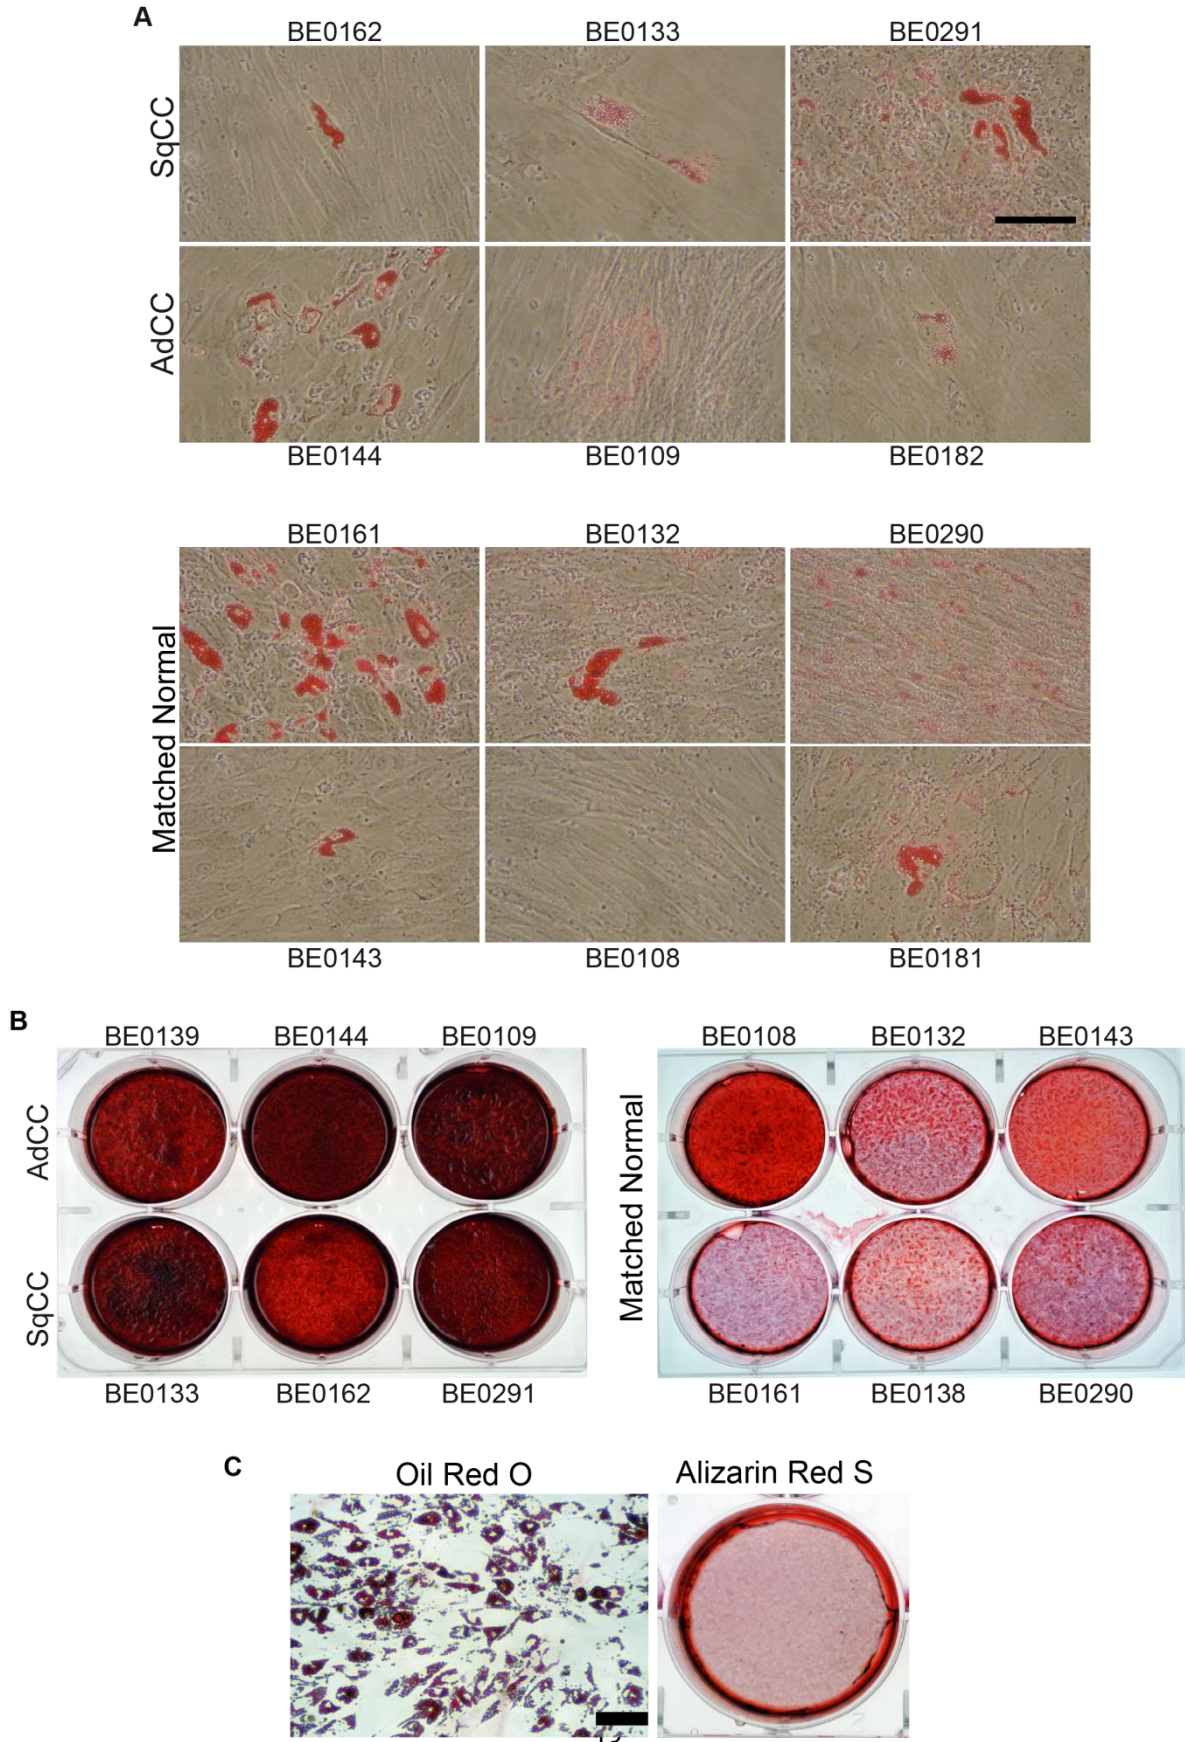

Figure S7. Differentiation potential of Lin-EpCAM-CD73+CD90+ perivascular cells, and bone marrow-derived mesenchymal stromal cells isolated from a healthy donor. (A) Phase contrast image showing uptake of Oil Red O in tumor (upper panels) and matched normal (lower panels) Lin-EpCAM-CD73+CD90+ perivascular cells. Scale bar 50  $\mu$ m. (B) Alizarin Red S staining in tumor (left panels) and matched normal (right panels) Lin-EpCAM-CD73+CD90+ perivascular cells. (C) Representative image of BM-adipogenic differentiation in BM-MSCs depicted by uptake of Oil Red O (left panel). Osteogenic differentiation potential in BM-MSCs depicted by Alizarin Red S staining (right panel). Scale bar 50  $\mu$ m.

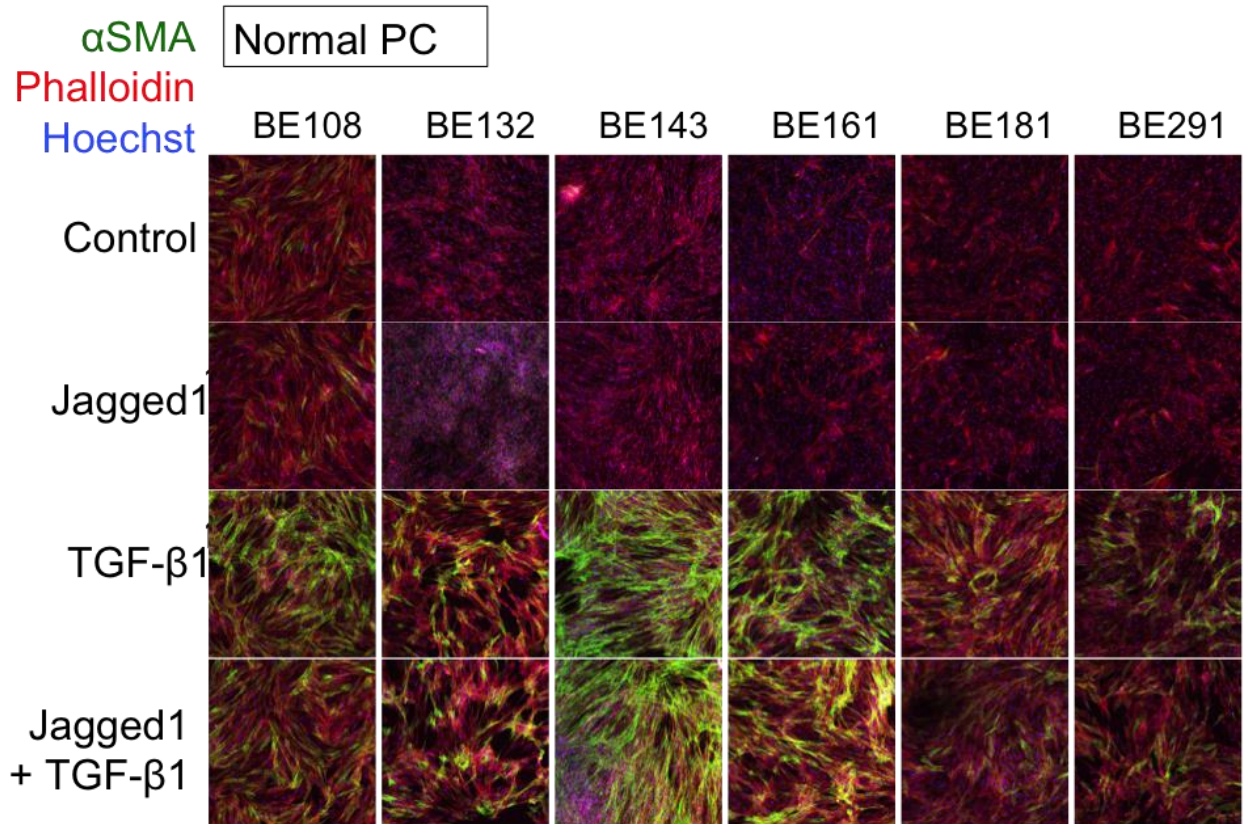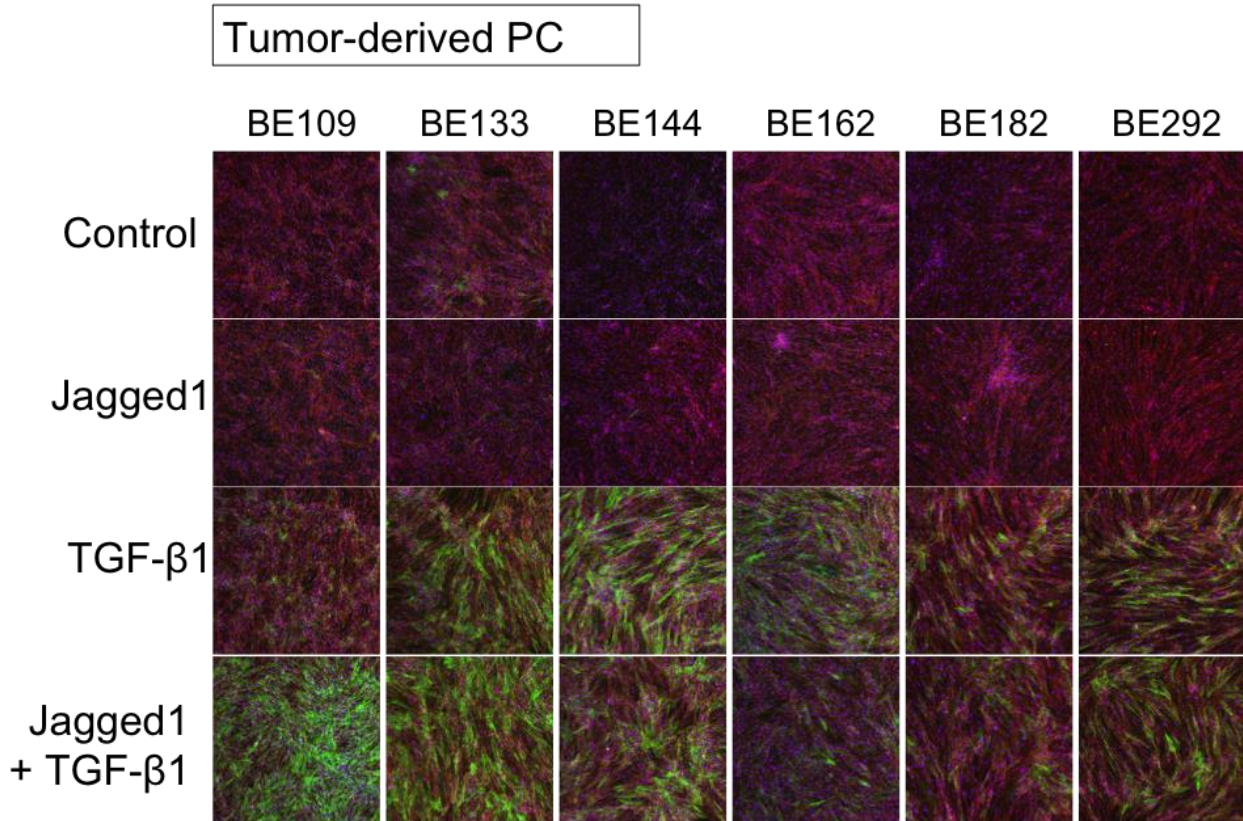

Figure S8. Upregulation of  $\alpha$ SMA in tumor-derived Lin-EpCAM-CD73+CD90+ mesenchymal cells and their matched normal counterpart. Representative images taken from individual matched specimens three days after treatment with TGF- $\beta$ 1, Jagged1 or untreated control showing changes in phalloidin (red) and  $\alpha$ SMA (green). Related to Figure 4.



Normal PC

BE138

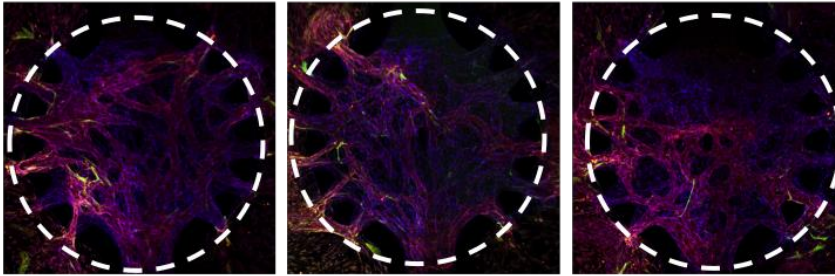

aSMA  
CD31  
Hoechst

Adenocarcinoma

BE161

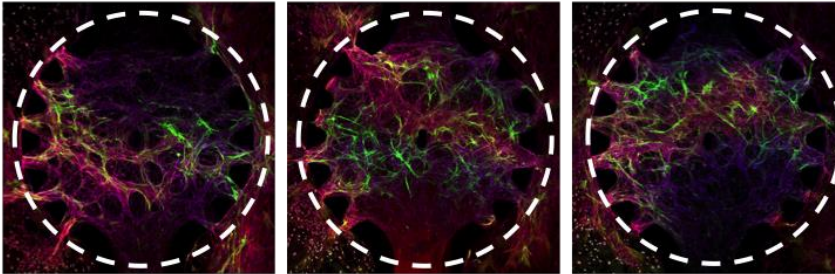

Squamous cell  
carcinoma

Tumor-derived PC

BE139

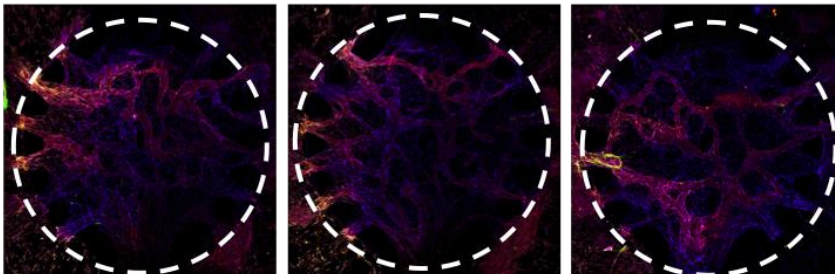

aSMA  
CD31  
Hoechst

Adenocarcinoma

BE162

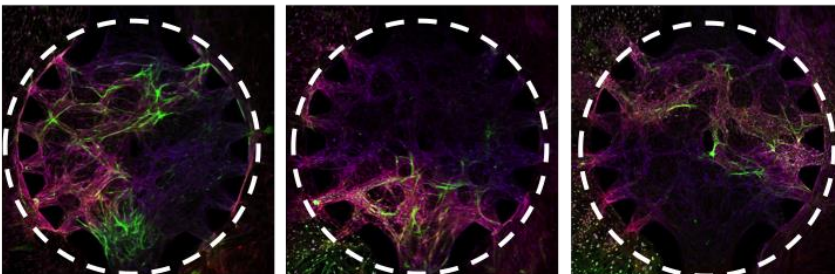

Squamous cell  
carcinoma

Figure S9. Whole-chip images (central chamber of 2.4mm delineated with a dashed line) with  $\alpha$ SMA and CD31 staining reveal a very heterogeneous upregulation in tumor-derived pericytes around endothelial vessels. Related to Figure 5.

**Table S1. Patient Characteristics**

| Patient ID | Histological type       | Sex | DOB        | Smoker       | Grade | Stage | Treatment          |
|------------|-------------------------|-----|------------|--------------|-------|-------|--------------------|
| BE063      | Adenocarcinoma          | f   | 03.11.1941 | not reported | G3    | IIB   | none               |
| BE079      | Squamous cell carcinoma | f   | 10.01.1941 | Y            | G3    | IIIA  | none               |
| BE0109     | Adenocarcinoma          | m   | 13.07.1953 | y            | G2    | IA    | none               |
| BE0133     | Squamous cell carcinoma | m   | 09.03.1950 | y            | G2    | IA    | none               |
| BE0135     | Squamous cell carcinoma | m   | 12.09.1950 | y            | G2    | IV    | none               |
| BE0139     | Adenocarcinoma          | f   | 19.07.1956 | y            | G2    | IIIA  | none               |
| BE0144     | Adenocarcinoma          | m   | 29.08.1963 | no           | nr    | IIIA  | Cisplatin          |
| BE0153     | Squamous cell carcinoma | f   | 02.07.1942 | former       | G2    | IIB   | none               |
| BE0162     | Squamous cell carcinoma | f   | 02.03.1940 | y            | G3    | IIIA  | none               |
| BE0182     | Adenocarcinoma          | m   | 11.08.1943 | not reported | G2    | IB    | none               |
| BE0190     | Adenocarcinoma          | m   | 03.03.1931 | former       | G2    | IA    | none               |
| BE0242     | Squamous cell carcinoma | m   | 25.02.1938 | y            | G2    | IB    | none               |
| BE0291     | Squamous cell carcinoma | m   | 28.05.1946 | y            | nr    | IIA   | Cisplatin/Taxotere |

y, yes

**Table S2.** List of antibodies used for FACS/flow cytometric analysis

| <b>Primary Antibodies</b>   | <b>Manufacturer</b> | <b>Clone</b>  | <b>Catalog #</b> |
|-----------------------------|---------------------|---------------|------------------|
| CD326 (EpCAM)-PE-Cy7        | eBioscience         | 1B7           | 25-9326-42       |
| CD326 (EpCAM)-BV605™        | BioLegend           | 9C4           | 324224           |
| CD73-FITC                   | eBioscience         | AD2           | 11-0739-42       |
| CD73-APC                    | eBioscience         | AD2           | 17-0739-42       |
| CD90-BV605                  | BioLegend           | 5E10          | 328128           |
| CD90-PE-TR                  | BD Horizon™         | 5E10          | 562385           |
| CD45-eFluor®450             | eBioscience         | 2D1           | 48-9459-42       |
| CD14-eFluor®450             | eBioscience         | 61D3          | 48-0149-42       |
| CD31-eFluor®450             | eBioscience         | WM-59         | 48-0319-42       |
| CD235a (GlyA)-eFluor®450    | eBioscience         | HIR2          | 48-9987-42       |
| CD274 (PD-L1)-FITC          | BD Biosciences      | MIH1          | 558065           |
| CD274 (PD-L1)-PE            | BioLegend           | 29E.2A3       | 329706           |
| CD105-PE-Cy7                | BioLegend           | 14G2a         | 357306           |
| CD146-FITC                  | eBioscience         | P1H12         | 11-1469-42       |
| CXCR4-BV711                 | BD Biosciences      | 12G5          | 740799           |
| GD2-APC                     | BioLegend           | 14G2a         | 357306           |
| NG2-FITC                    | eBioscience         | 9.2.27        | 53-6504-42       |
| CD54-Pacific Blue™          | BioLegend           | HA58          | 353110           |
| PDGFR $\alpha$ -PE          | BioLegend           | 16A1          | 323506           |
| PDGFR $\beta$ -APC          | BioLegend           | 18A2          | 323608           |
| CD61-APC                    | eBioscience         | V1-PL2        | 17-0619-42       |
| E-Cadherin Alexa Fluor® 488 | BD Pharmingen™      | 36/E-Cadherin | 560061           |
| 7-AAD                       | eBioscience         |               | 00-6990-50       |

**Table S3. Dye-based detection primers**

| <b>Target Gene</b>               | <b>Forward Primer (5'-3')</b>   | <b>Reverse Primer (5'-3')</b>    | <b>RefSeq ID</b> | <b>Efficiency</b> |
|----------------------------------|---------------------------------|----------------------------------|------------------|-------------------|
| POSTN                            | CAACGGGCAAATACTGGAAAC           | TCTCGCGGAATATGTGAATCG            | NM_001135934.1   | 90%               |
| TP53                             | GCTTTCCACGACGGTGAC              | GCTCGACGCTAGGATCTGAC             | NM_000546        | 100%              |
| FAP                              | ATCTATGACCTTAGCAATGGAGAATTTGT   | GTTTGATAGACATATGCTAATTTACTCCCAAC | NM_004460.3      | 93%               |
| GLI1                             | CCAGCGCCCAGACAGAG               | GGCTCGCCATAGCTACTGAT             | NM_005269.2      | 98%               |
| RGS5                             | CCTCCTTCTGTTGCTCTCTTT           | CAGTCACATAGTTGCTTCACTTTC         | NM_001195303.2   | 94%               |
| DES                              | CCAAGCAGGAGATGATGGAATA          | CCTCATCAGGGAATCGTTAGTG           | NM_001927.3      | 97%               |
| CNN1                             | GTTTGAGAACACCAACCATACAC         | CACGTTACCTTGTTTCCTTTC            | NM_001299.5      | 93%               |
| ACTA2                            | GATGGTGGGAATGGGACAAA            | GCCATGTTCTATCGGGTACTTC           | NM_001141945.1   | 99%               |
| VEGFa                            | CGA GGG CCT GGA GTG TGT         | CGC ATA ATC TGC ATG GTG ATG      | NM_003376.5      | 99%               |
| <b>Internal control</b>          |                                 |                                  |                  |                   |
| TBP                              | AACAACAGCCTGCCACCTTA            | GCCATAAGGCATCATTGGAC             | NM_003194        | 91%               |
| GAPDH                            | TCG ACA GTC AGC CGC ATC TTC TTT | GCC CAA TAC GAC CAA ATC CGT TGA  | NM_002046.5      | 98%               |
| H3F3A                            | GGT GTC TTC AAA AAG GCC AA      | GCG AGA AAT TGC TCA GGA CT       | NM_002107        | 98%               |
| <b>TaqMan primer/probe assay</b> |                                 |                                  |                  |                   |
| <b>Target Gene</b>               | <b>Assay ID</b>                 | <b>RefSeq ID</b>                 |                  |                   |
| PD-L1                            | Hs00204257_m1                   | NM_001314029.1                   |                  |                   |
| <b>Internal control</b>          |                                 |                                  |                  |                   |
| TBP                              | Hs00427620_m1                   | NM_003194.4                      |                  |                   |
| GADPH                            | Hs02758991_g1                   | NM_002046.5                      |                  |                   |
| H3F3A                            | Hs02598544_g1                   | NM_002107.4                      |                  |                   |

## **Supplementary movies**

Supplementary movie S1. 3D rendering of tumor pericyte-endothelial cell interaction in patent formed vascular structure in microfluidic chip.

Supplementary movie S2. Time-lapse video of RITC-dextran perfusion through a microvascular network stabilized by normal pericytes.

Supplementary movie S3. Time-lapse video of RITC-dextran perfusion through a microvascular network stabilized by tumor-derived pericytes.
